# Supplementary material
Source: Springer Nature journal article supplement (https://www.springermedizin.de/resource/supplementary/12871_2003_10_MOESM2_ESM.pdf/9429448)
Supplement: MOESM2 [file 9429448]

| Author                | Title                                                                                                                                                                                                   | Reference                                                                                        | Reason for exclusion                                 |
|-----------------------|---------------------------------------------------------------------------------------------------------------------------------------------------------------------------------------------------------|--------------------------------------------------------------------------------------------------|------------------------------------------------------|
| Alsalameh et al 2003  | The pharmacological properties and clinical use of valdecoxib, a new cyclo-oxygenase-2 selective inhibitor                                                                                              | Ailment Pharmacol Ther 2003;17(4):489-501                                                        | Review                                               |
| Baker 2002            | Valdecoxib                                                                                                                                                                                              | Rev Gastroenterol Disord 2002;2(3):116-25                                                        | Review                                               |
| Bensen et al 2002     | Efficacy and safety of valdecoxib in treating the signs and symptoms of rheumatoid arthritis: a randomized, controlled comparison with placebo and naproxen                                             | Rheumatol 2002; 41(9):1008-16                                                                    | Not acute pain                                       |
| Camu et al 2001       | The COX-2 specific inhibitor valdecoxib is opioid-sparing and provides effective analgesia in primary hip arthroplasty patients                                                                         | Am J Ther 2002; 9 (1): 43-51                                                                     | Concurrent opioid administration                     |
| Carr 2001             | Parecoxib: a viewpoint                                                                                                                                                                                  | Drugs 2001;61(8):1142                                                                            | Review                                               |
| Cheer et al 2001      | Parecoxib (Parecoxib Sodium)                                                                                                                                                                            | Drugs 2001;61(8):1133-1143                                                                       | Review                                               |
| Coats et al 2002      | Analgesic efficacy of valdecoxib 40 mg QD in the treatment of chronic low back pain                                                                                                                     | ???                                                                                              | Not acute pain                                       |
| Daniels et al 2000    | Pharmacokinetic and efficacy evaluation of intravenous parecoxib in a postsurgical dental pain model.                                                                                                   | Clin Pharm Ther 2000; 67(2):91                                                                   | Data not legible                                     |
| Daniels et al 2001    | Pre-operative valdecoxib, a COX-2 specific inhibitor, provides effective and long lasting relief following oral surgery                                                                                 | Anesthesiol 2001:A-811                                                                           | Pre-operative administration                         |
| Daniels et al 2002    | Valdecoxib, a cyclooxygenase-2-specific inhibitor, is effective in treating primary dysmenorrhea                                                                                                        | Obstet Gynecol 2002; 100(2):350-8                                                                | Not acute pain resulting from surgical trauma        |
| Desjardins et al 2001 | The injectable cyclooxygenase-2-specific inhibitor parecoxib sodium has analgesic efficacy when administered preoperatively                                                                             | Anesth Analg 2001;93(3):721-727                                                                  | Pre-op administration                                |
| Desjardins et al 2001 | Pre-operative administration of valdecoxib, a potent COX-2 specific inhibitor, provides effective post-operative relief                                                                                 | Anesthesiol 2001;95:A807                                                                         | Pre-operative administration                         |
| Gan et al 2002        | Postdischarge recovery experience after single presurgery dose of iv parecoxib sodium, a novel COX-2 inhibitor followed by oral valdecoxib for pain associated with laparoscopic cholecystectomy        | American Society of Anesthesiologists 53rd Annual Meeting 2002, Orlando, USA                     | Pre-op administration                                |
| Gotta et al 2002      | Valdecoxib (Pharmacia)                                                                                                                                                                                  | Curr Opin Investig Drugs 2002;3(2):240-5                                                         | Review                                               |
| Harris et al 2001     | Upper gastrointestinal safety evaluation of parecoxib sodium, a new parenteral cyclooxygenase-2-specific inhibitor, compared with ketorolac, naproxen, and placebo                                      | Clin Ther 2001; 23(9):1422-1428                                                                  | GI safety study                                      |
| Harris et al 2001     | Parecoxib sodium, an injectable COX-2 specific inhibitor, shows improved upper gastrointestinal (UGI) safety compared to ketorolac                                                                      | American College of Emergency Physicians scientific assembly 2001, Chicago, USA, Abstract 129    | GI safety study                                      |
| Hood et al 2003       | Characterisation of celecoxib and valdecoxib binding to cyclooxygenase                                                                                                                                  | Mol Pharmacol 2003;63(4):870-7                                                                   | Drug development                                     |
| Hubbard et al 2000    | An endoscopic study of the gastroduodenal effects of SC-69124A, a parenteral COX-2 specific inhibitor, in the elderly                                                                                   | Gastroenterol 2000;118(4 suppl 2):A250 Abstract 1455                                             | Safety study                                         |
| Hubbard et al 2001    | The COX-2 specific inhibitor parecoxib sodium is effective in treating post-operative pain in total hip arthroplasty patients                                                                           | Anesthesiol 2001;95:A807                                                                         | Abstract - no data                                   |
| Hubbard et al 2001    | Preoperative administration of parecoxib sodium effectively reduced post-operative pain in bunionectomy patients                                                                                        | American Society of Anesthesiologists 52nd Annual Meeting 2001, New Orleans, USA, Abstract A-812 | Pre-op administration                                |
| Hubbard et al 2001    | The COX-2 specific inhibitor parecoxib sodium is an effective opioid-sparing agent in patients undergoing knee replacement surgery                                                                      | Anesthesiol 2001;95:A808                                                                         | Concurrent opioid administration                     |
| Ibrahim et al 2002    | The inference of parecoxib, a parenteral cyclooxygenase-2 specific inhibitor, on the pharmacokinetics and clinical effects of midazolam                                                                 | Anesth Analg 2002;95:667-73                                                                      | Interaction study (midazolam)                        |
| Ibrahim et al 2002    | Effects of parecoxib, a parenteral COX-2-specific inhibitor, on the pharmacokinetics and the pharmacodynamics of propofol                                                                               | Anesthesiol 2002;96(1):88-95                                                                     | Interaction study (propofol)                         |
| Jain 2000             | Evaluation of intravenous parecoxib for the relief of acute post-surgical pain                                                                                                                          | Exp Opin Invest Drugs 2000;9:2717-2723                                                           | Review                                               |
| Joshi et al 2002      | Patient postdischarge symptom experience after single presurgery dose of iv parecoxib sodium, a novel COX-2 inhibitor followed by oral valdecoxib for pain associated with laparoscopic cholecystectomy | American Society of Anesthesiologists 53rd Annual Meeting 2002, Orlando, USA                     | Pre-op administration (duplicate of Gan et al 2002?) |
| Karim et al           | A pharmacokinetic study of intramuscular (IM) parecoxib sodium in normal subjects                                                                                                                       | J Clin Pharmacol 2001;41(10):1111-1119                                                           | Pharmacokinetic study                                |
| Karim et al 2001      | The COX-2 specific inhibitor parecoxib sodium does not affect warfarin pharmacokinetic and pharmacodynamic parameters                                                                                   | American College of Emergency Physicians scientific assembly 2001, Chicago, USA, Abstract 130    | Interaction study (warfarin)                         |
| Kenaan et al 2001     | Analgesic activity and safety of parecoxib in post-surgical patients: An interim report                                                                                                                 | Anesth Analg 2001;92:S257                                                                        | Abstract - no data                                   |

|                       |                                                                                                                                                                                        |                                                                                                  |                                             |
|-----------------------|----------------------------------------------------------------------------------------------------------------------------------------------------------------------------------------|--------------------------------------------------------------------------------------------------|---------------------------------------------|
| Kharasch et al 2001   | Effects of parecoxib, a parenteral COX-2-specific inhibitor, on the pharmacokinetics and clinical effects of fentanyl and alfentanil                                                   | American Society of Anesthesiologists 52nd Annual Meeting 2001, New Orleans, USA, Abstract A-450 | Interaction study (fentanyl and alfentanil) |
| Kivitz et al 2002     | Randomised placebo-controlled trial comparing efficacy and safety of valdecoxib with naproxen in patients with osteoarthritis                                                          | J Fam Pract 2002; 51(6):530-7                                                                    | Not acute pain                              |
| Kivitz et al 2002     | The COX-2 specific inhibitor valdecoxib is as effective as naproxen in treating symptomatic osteoarthritis of the knee and demonstrates reduced gastrointestinal ulceration            | J Fam Pract 2002; 133: 611-621                                                                   | Not acute pain                              |
| Kuss et al 1999       | Analgesic efficacy of single IV doses of parecoxib, a COX-2 specific inhibitor and Toradol in postoperative dental pain.                                                               | 7th World Congress on Pain 1999, Vienna, Austria.                                                | Abstract - no data                          |
| Langeland et al 2000  | A comparative analgesic efficacy study of parecoxib, a new COX-2 specific inhibitor, in post-gynecologic surgery patients                                                              | American Pain Society 2000; Abstract 814                                                         | Abstract - no data                          |
| Leese et al 2001      | The injectable COX-2 specific inhibitor parecoxib sodium does not affect platelet aggregation at therapeutic doses                                                                     | American College of Emergency Physicians scientific assembly 2001, Chicago, USA, Abstract 131    | Safety study                                |
| Leese et al 2002      | Valdecoxib, a novel COX-2 inhibitor, does not impair platelet function in healthy adults: results of a randomized controlled trial                                                     | Am J Emerg Med 2002; 20 (4); 275-81                                                              | Pharmacokinetic study                       |
| Macario et al 2001    | Ketorolac in the era of cyclooxygenase-2 selective nonsteroidal anti-inflammatory drugs: a systematic review of efficacy, side effects and regulatory issues                           | Pain Medicine 2001;2(4)                                                                          | Review                                      |
| Makarowski et al 2002 | Efficacy and safety of the COX-2 specific inhibitor valdecoxib in the management of osteoarthritis of the hip: a randomized, double-blind, placebo-controlled comparison with naproxen | Osteoarthritis and Cartilage 2002; 10: 290-296                                                   | Not acute pain                              |
| Malan et al 2001      | Parecoxib sodium, a new injectable COX-2 specific inhibitor is opioid sparing and improves pain relief in postoperative hip arthroplasty patients                                      | J Pain 2001;2(suppl1):38                                                                         | Concurrent opioid administration            |
| Mehlisch et al 2000   | Correlation of pharmacokinetics (PK) with the onset and duration of analgesia of intramuscular doses of parecoxib and Toradol in postoperative dental pain.                            | Clin Pharm Ther 2000; 67(2):143                                                                  | Abstract - no data                          |
| Minkowitz et al 2002  | Efficacy and safety of a single dose of iv parecoxib sodium followed by up to seven days of oral valdecoxib for pain following laparoscopic cholecystectomy                            | 10th World Congress on Pain 2002, San Diego, USA, Abstract 948-P218                              | Pre-op administration                       |
| Minkowitz et al 2002  | Efficacy and safety of a single dose of IV parecoxib sodium followed by up to seven days of oral valdecoxib for pain following laparoscopic cholecystectomy                            | Poster. World Congress on Pain, 17-22 Aug 2002, San Diego, USA                                   | Concurrent opioid administration            |
| Noveck et al 2001     | Parecoxib sodium does not impair platelet function in healthy elderly and non-elderly individuals: two randomised controlled trials                                                    | Clin Drug Invest 2001;21(7):456-476                                                              | Safety studies                              |
| Noveck et al 2001     | Parecoxib sodium, an injectable COX-2 specific inhibitor, does not affect aspirin-mediated platelet function                                                                           | Regional Anesthesia and Pain medicine 2001;26(2):19                                              | Interaction study (aspirin)                 |
| Noveck et al 2001     | Parecoxib sodium, an injectable COX-2 specific inhibitor, does not affect heparin-regulated blood coagulation parameters                                                               | Regional Anesthesia and Pain medicine 2001;26(2):20                                              | Interaction study (heparin)                 |
| Ormrod et al 2002     | Valdecoxib                                                                                                                                                                             | Drugs 2002;62(14):2059-71                                                                        | Review                                      |
| Rasmussen et al 2001  | A comparative analgesic efficacy study of parecoxib sodium, a new injectable COX-2-specific inhibitor, in post-orthopaedic surgery patients                                            | J Pain 2001;2(suppl 1):39, abstract 776                                                          | Abstract - no data                          |
| Rasmussen et al 2002  | Intravenous parecoxib sodium for acute pain after orthopaedic knee surgery                                                                                                             | Am J Orthop 2002;336-343                                                                         | include                                     |
| Reynolds et al 2003   | The COX-2 specific inhibitor, valdecoxib, is an effective opioid-sparing analgesic in patients undergoing total knee arthroplasty                                                      | J Pain Symptom Manage 2003;25(2):133-41                                                          | Concurrent opioid administration            |
| Sikes et al 2002      | Incidence of gastroduodenal ulcers with valdecoxib compared with that of ibuprofen and diclofenac in patients with osteoarthritis                                                      | Eur J of Gastroenterol 2002; 14(10):1101-1111                                                    | GI safety study                             |
| Sorbera et al 2001    | Valdecoxib and parecoxib sodium: analgesic, antiarthritic, cyclooxygenase-2 inhibitor                                                                                                  | Drugs Future 2001;26(2):133-140                                                                  | Review                                      |
| Stoltz et al 2002     | Upper GI mucosal effects of parecoxib sodium in healthy elderly subjects                                                                                                               | Am J Gastroenterol 2002;97(1):65-71                                                              | GI safety study                             |
| Talley et al 2000     | Parecoxib sodium: a potent and selective inhibitor of COX-2 for parenteral administration                                                                                              | J Med Chem 2000;43:1661-1663                                                                     | Review                                      |
| Tang et al 2001       | Effect of parecoxib, a new cyclooxygenase-2 inhibitor, on postoperative analgesia                                                                                                      | Anesth Analg 2002;92:S270                                                                        | Abstract and duplicate of Tang 2002         |
| Tang et al 2002       | Effect of parecoxib, a novel intravenous cyclooxygenase-2 inhibitor, on postoperative opioid requirement and quality of pain control                                                   | Anesthesiol 2002; 96(6):1305-1309                                                                | Concurrent opioid administration            |
| Torres et al 2002     | The oral COX-2 specific inhibitor valdecoxib provides effective analgesia in patients undergoing inguinal hernia repair                                                                | Poster. ESA, 6-9 April 2002, Nice, France                                                        | Data inconsistent and insufficient detail   |
| Viscusi et al 2002    | In-hospital resource use to manage pain after a single dose of parecoxib sodium, a novel parenteral COX-2 inhibitor for pain associated with laparoscopic cholecystectomy              | American Society of Anesthesiologists 53rd Annual Meeting 2002, Orlando, USA                     | Abstract - no data                          |
